# Supplementary material for: Diversity and functions of bacterial community in drinking water biofilms revealed by high-throughput sequencing
Source: PubMed Central journal article supplement (PMC4464384; doi:10.1038/srep10044), 2015-06-12
Supplement: srep10044-s1.pdf [file srep10044-s1.pdf]

1  
2  
3  
4  
5  
6  
7  
8  
9  
10  
11  
12  
13  
14  
15

## **Supporting Information**

### **For**

#### **Diversity and functions of bacterial community in drinking water biofilms revealed by high-throughput sequencing**

Yuanqing Chao<sup>1,2</sup>, Yanping Mao<sup>1</sup>, Zhiping Wang<sup>1,3</sup>, Tong Zhang<sup>1,\*</sup>

<sup>1</sup> Environmental Biotechnology Lab, The University of Hong Kong, Pokfulam Road, Hong Kong SAR, China

<sup>2</sup> School of Environmental Science and Engineering, Sun Yat-Sen University, Guangzhou, China

<sup>3</sup> School of Environmental Science and Engineering, Shanghai Jiao Tong University, Shanghai, China

---

\* Corresponding author. Email: zhangt@hku.hk. Phone: (852) 28598551. Fax: (852) 25595337.

16 *Experimental repeatability*

17 To test the repeatability of DNA extraction, PCR and 454 pyrosequencing, the 180 d  
18 biofilm was divided into duplicates. DNA was extracted from the two duplicates, PCR  
19 conducted and then sequenced individually. The results generated indicated that the  
20 analysis was repeatable at the genus level ( $R^2 = 0.976$ , Figure S7).

21 **Table S1** The genus list of several bacterial groups, including potentially pathogenic  
 22 bacteria, iron-oxidizing bacteria, and sulfate-reducing bacteria, according to previous  
 23 studies.

| Bacterial groups | Potentially pathogenic bacteria | Iron-oxidizing bacteria   | Sulfate-reducing bacteria |
|------------------|---------------------------------|---------------------------|---------------------------|
| Genus list       | <i>Aeromonas</i>                | <i>Acidimicrobium</i>     | <i>Bdellovibrio</i>       |
|                  | <i>Arcobacter</i>               | <i>Acidithiobacillus</i>  | <i>Clostridium</i>        |
|                  | <i>Bordetella</i>               | <i>Alicyclobacillus</i>   | <i>Desulfobacter</i>      |
|                  | <i>Borrelia</i>                 | <i>Aquifex</i>            | <i>Desulfobacterium</i>   |
|                  | <i>Brucella</i>                 | <i>Chlorobium</i>         | <i>Desulfobulbus</i>      |
|                  | <i>Campylobacter</i>            | <i>Ferrimicrobium</i>     | <i>Desulfococcus</i>      |
|                  | <i>Chlamydia</i>                | <i>Ferrithrix</i>         | <i>Desulfohalobium</i>    |
|                  | <i>Chlamydomphila</i>           | <i>Ferritrophicum</i>     | <i>Desulfomicrobium</i>   |
|                  | <i>Clostridium</i>              | <i>Gallionella</i>        | <i>Desulfomonas</i>       |
|                  | <i>Corynebacterium</i>          | <i>Leptospirillum</i>     | <i>Desulfomonile</i>      |
|                  | <i>Enterobacter</i>             | <i>Leptothrix</i>         | <i>Desulfonatronum</i>    |
|                  | <i>Enterococcus</i>             | <i>Marinobacter</i>       | <i>Desulfonema</i>        |
|                  | <i>Escherichia</i>              | <i>Mariprofundus</i>      | <i>Desulfosarcina</i>     |
|                  | <i>Francisella</i>              | <i>Pseudogulbenkiania</i> | <i>Desulfotomaculum</i>   |
|                  | <i>Haemophilus</i>              | <i>Rhodobacter</i>        | <i>Desulfovibrio</i>      |
|                  | <i>Helicobacter</i>             | <i>Rhodopseudomonas</i>   | <i>Desulfuromonas</i>     |
|                  | <i>Klebsiella</i>               | <i>Sideroxydans</i>       | <i>Desulfuromusa</i>      |
|                  | <i>Legionella</i>               | <i>Sphaerotilus</i>       | <i>Geobacter</i>          |
|                  | <i>Leptospira</i>               | <i>Thiobacillus</i>       | <i>Myxococcus</i>         |
|                  | <i>Listeria</i>                 |                           | <i>Pelobacter</i>         |

|           |                       |                              |                               |
|-----------|-----------------------|------------------------------|-------------------------------|
|           | <i>Mycobacterium</i>  |                              | <i>Pseudomonas</i>            |
|           | <i>Mycoplasma</i>     |                              | <i>Syntrophobacter</i>        |
|           | <i>Neisseria</i>      |                              | <i>Thermodesulfobacterium</i> |
|           | <i>Pseudomonas</i>    |                              | <i>Thermodesulfobivrio</i>    |
|           | <i>Salmonella</i>     |                              |                               |
|           | <i>Serratia</i>       |                              |                               |
|           | <i>Shigella</i>       |                              |                               |
|           | <i>Staphylococcus</i> |                              |                               |
|           | <i>Streptococcus</i>  |                              |                               |
|           | <i>Treponema</i>      |                              |                               |
|           | <i>Vibrio</i>         |                              |                               |
|           | <i>Yersinia</i>       |                              |                               |
| Total     | 32                    | 19                           | 24                            |
| Reference | Ye and Zhang, 2011    | Emerson <i>et al.</i> , 2010 | Castro <i>et al.</i> , 2000   |

24 **Reference:**

- 25 Ye, L. & Zhang, T. Pathogenic bacteria in sewage treatment plants as revealed by 454  
 26 pyrosequencing. *Environ. Sci. Technol.* **45**, 7173-7179 (2011).  
 27 Emerson, D., Fleming, E. J. & McBeth, J. M. Iron-oxidizing bacteria: an environmental and  
 28 genomic perspective. *Annu. Rev. Microbiol.* **64**, 561-583 (2010).  
 29 Castro, H. E., Williams, N. H. & Ogram, A. Phylogeny of sulfate-reducing bacteria. *FEMS*  
 30 *Microbiol. Ecol.* **31**, 1-9 (2000).

31

32 **Table S2** Evaluation of completeness and redundancy of extracted draft genome by core COGs of the reference genomes in order *Rhizobiales*  
 33 and 9 families of this order.

| Levels | Name                       | No. of Reference | Core COGs |           | Single core COGs |           | Completeness (%) | Redundancy (%) |
|--------|----------------------------|------------------|-----------|-----------|------------------|-----------|------------------|----------------|
|        |                            |                  | Bin       | Reference | Bin              | Reference |                  |                |
| Order  | <i>Rhizobiales</i>         | 96               | 74        | 75        | 0                | 0         | 99               | 0              |
|        | <i>Bartonellaceae</i>      | 9                | 655       | 725       | 514              | 573       | 90               | 19             |
|        | <i>Beijerinckiaceae</i>    | 2                | 1,169     | 1,487     | 702              | 914       | 79               | 13             |
|        | <i>Bradyrhizobiaceae</i>   | 16               | 1,033     | 1,195     | 0                | 1         | 86               | 0              |
|        | <i>Brucellaceae</i>        | 21               | 1,055     | 1,350     | 607              | 808       | 78               | 10             |
| Family | <i>Hyphomicrobiaceae</i>   | 5                | 928       | 1,045     | 481              | 548       | 89               | 7              |
|        | <i>Methylobacteriaceae</i> | 8                | 1,190     | 1,539     | 479              | 637       | 77               | 5              |
|        | <i>Phyllobacteriaceae</i>  | 6                | 1,095     | 1,287     | 476              | 561       | 85               | 5              |
|        | <i>Rhizobiaceae</i>        | 24               | 573       | 629       | 243              | 275       | 91               | 3              |
|        | <i>Xanthobacteraceae</i>   | 3                | 1,174     | 1,460     | 588              | 736       | 80               | 8              |

34

35 **Table S3** Phylogenetic analysis of the draft genome by annotating the ORFs.

| Level  | Closest taxon <sup>a</sup> | Attributed ORFs | Percentage | Criteria <sup>b</sup> | Pass/Fail |
|--------|----------------------------|-----------------|------------|-----------------------|-----------|
| Phylum | <i>Proteobacteria</i>      | 3,178/3,458     | 92%        | >50%                  | Pass      |
| Class  | <i>Alphaproteobacteria</i> | 2,641/3,458     | 76%        | >50%                  | Pass      |
| Order  | <i>Rhizobiales</i>         | 1,568/3,458     | 45%        | >40%                  | Pass      |
| Family | <i>Bradyrhizobiaceae</i>   | 618/3,458       | 18%        | >34%                  | Fail      |

36 <sup>a</sup> The closest taxon at a specific level was selected according to the number of attributed ORFs;

37 <sup>b</sup> The phylogenetic levels of bins were identified by the following criteria: for phylum and class  
 38 level, > 50% of ORFs in the draft genome could be attributed; for order and family level, > 40%  
 39 and > 34% of ORFs could be attributed, respectively (Ishii et al., 2013) .

40 **Reference:**

41 Ishii, S. et al. A novel metatranscriptomic approach to identify gene expression dynamics during  
 42 extracellular electron transfer. Nat. Commun. **4**, 1601 (2013).

43

44 **Table S4** Surface tension, zeta potential and RMS roughness of the three materials  
45 used in the present study.

| Materials | Surface tension (mJ/m <sup>2</sup> ) <sup>a</sup> | Zeta potential (mV) <sup>b</sup> | RMS roughness (nm) <sup>c</sup> |
|-----------|---------------------------------------------------|----------------------------------|---------------------------------|
| PC        | 42 ± 1.1                                          | -27 ± 4.6                        | 21 ± 8.5                        |
| PE        | 34 ± 1.6                                          | -29 ± 2.3                        | 21 ± 6.4                        |
| SS        | 41 ± 1.8                                          | 40 ± 7.3                         | 83 ± 25                         |

46 <sup>a</sup> Surface tension was evaluated by using contact angle method;

47 <sup>b</sup> Zeta potential was measured in 100 mM PBS solution;

48 <sup>c</sup> Roughness was calculated by the AFM height images with scan sizes of 2 × 2 μm<sup>2</sup>.

49

50 **Table S5** Detailed water quality of the tap water in all 12 time points.

| Parameters (Unit)                        | Time points |        |        |        |       |       |       |       |        |      |        |        | Average $\pm$ SD <sup>a</sup> |
|------------------------------------------|-------------|--------|--------|--------|-------|-------|-------|-------|--------|------|--------|--------|-------------------------------|
|                                          | 1           | 2      | 3      | 4      | 5     | 6     | 7     | 8     | 9      | 10   | 11     | 12     |                               |
| Temperature ( °C)                        | 27          | 26     | 26     | 22     | 23    | 25    | 23    | 26    | 25     | 25   | 26     | 26     | 25 $\pm$ 1.5                  |
| pH                                       | 7.1         | 7.5    | 6.9    | 7.4    | 7.7   | 6.6   | 7.1   | 7.4   | 7.7    | 7.5  | 7.0    | 7.7    | 7.3 $\pm$ 0.35                |
| Dissolved oxygen (mg/L)                  | 6.9         | 7.5    | 7.0    | 6.8    | 7.7   | 7.2   | 7.1   | 6.8   | 7.0    | 7.6  | 6.7    | 7.4    | 7.1 $\pm$ 0.33                |
| Total organic carbon (mg/L) <sup>b</sup> | 1.1         | 2.6    | 1.9    | 2.7    | 1.7   | 1.3   | 1.5   | 2.3   | 1.3    | 2.0  | 2.1    | 2.3    | 1.9 $\pm$ 0.51                |
|                                          | 1.1         | 2.5    | 1.7    | 2.5    | 1.8   | 1.2   | 1.5   | 2.3   | 1.4    | 1.9  | 2.1    | 2.5    |                               |
| Inorganic carbon (mg/L) <sup>b</sup>     | 7.0         | 6.1    | 5.5    | 6.2    | 5.6   | 7.6   | 5.8   | 6.1   | 6.8    | 7.2  | 7.6    | 5.5    | 6.4 $\pm$ 0.79                |
|                                          | 7.0         | 6.1    | 5.4    | 6.2    | 5.7   | 7.7   | 5.8   | 5.9   | 7.0    | 7.2  | 7.5    | 5.5    |                               |
| Total nitrogen (mg/L)                    | 2.1         | 1.4    | 1.1    | 2.1    | 1.0   | 1.3   | 0.98  | 1.2   | 1.2    | 1.6  | 1.9    | 1.1    | 1.4 $\pm$ 0.41                |
| Total phosphate (mg/L)                   | 0.021       | 0.0084 | 0.0084 | 0.0084 | 0.017 | 0.013 | 0.013 | 0.013 | 0.0084 | 0    | 0.0084 | 0.0042 | 0.010 $\pm$ 0.0055            |
| Residual chlorine (mg/L)                 | 0.02        | 0.08   | 0.1    | 0.11   | 0.07  | 0.09  | 0.11  | 0     | 0.04   | 0.13 | 0.02   | 0.02   | 0.066 $\pm$ 0.044             |
| Conductivity ( $\mu$ s/cm)               | 154         | 144    | 139    | 136    | 148   | 152   | 166   | 170   | 160    | 173  | 170    | 139    | 154 $\pm$ 13                  |
| Turbidity (NTU <sup>c</sup> )            | 0.88        | 0.48   | 0.26   | 0.19   | 0.12  | 0.12  | 0.20  | 0.29  | 0.17   | 0.11 | 0.084  | 0.097  | 0.25 $\pm$ 0.23               |
| Total dissolved solid (mg/L)             | 150         | 146    | 88     | 136    | 152   | 108   | 128   | 212   | 100    | 184  | 179    | 102    | 140 $\pm$ 38                  |

51 <sup>a</sup> Standard deviation; <sup>b</sup> TOC and IC tests were repeated twice for one sample; <sup>c</sup> Nephelometric turbidity units.



52 **Table S6** The basic information of 30 metagenomic data in three aquatic ecosystems (including ocean, fresh water and drinking water), which  
 53 were applied to principal component analysis in the present study.

| Biome         | MG-RAST ID | Metagenome size<br>(bp) | Reads No.  | Location                                                                  | Sequence<br>Method |
|---------------|------------|-------------------------|------------|---------------------------------------------------------------------------|--------------------|
| Ocean_1       | 4441148.3  | 54,752,102              | 50,609     | Indian Ocean, St. Anne Island, Seychelles                                 | other <sup>a</sup> |
| Ocean_2       | 4441139.4  | 52,667,848              | 50,096     | Indian Ocean, International waters between<br>Madagascar and South Africa | other              |
| Ocean_3       | 4441150.3  | 64,230,062              | 61,020     | Indian Ocean                                                              | other              |
| Ocean_4       | 4441155.3  | 62,752,349              | 59,813     | Indian Ocean                                                              | other              |
| Ocean_5       | 4441608.3  | 53,607,277              | 49,597     | Indian Ocean                                                              | other              |
| Ocean_6       | 4441135.3  | 45,710,196              | 46,052     | Indian Ocean, Madagascar Waters, Madagascar                               | other              |
| Ocean_7       | 4441149.3  | 64,223,447              | 60,932     | Outside Seychelles, Indian Ocean, Seychelles                              | other              |
| Ocean_8       | 4441147.3  | 55,638,894              | 52,118     | Indian Ocean                                                              | other              |
| Ocean_9       | 4441156.3  | 62,072,289              | 59,080     | Indian Ocean                                                              | other              |
| Ocean_10      | 4441134.3  | 53,607,277              | 49,597     | Indian Ocean                                                              | other              |
| Fresh water_1 | 4534328.3  | 1,888,723,700           | 18,887,237 | Minnesota, United States                                                  | Illumina           |
| Fresh water_2 | 4534330.3  | 1,847,964,400           | 18,479,644 | Minnesota, United States                                                  | Illumina           |
| Fresh water_3 | 4534342.3  | 1,647,353,500           | 16,473,535 | Minnesota, United States                                                  | Illumina           |
| Fresh water_4 | 4534350.3  | 1,623,038,100           | 16,230,381 | Minnesota, United States                                                  | Illumina           |

|                    |           |               |            |                                 |          |
|--------------------|-----------|---------------|------------|---------------------------------|----------|
| Fresh water_5      | 4534344.3 | 1,606,029,200 | 16,060,292 | Minnesota, United States        | Illumina |
| Fresh water_6      | 4534338.3 | 1,599,106,200 | 15,991,062 | Minnesota, United States        | Illumina |
| Fresh water_7      | 4534336.3 | 1,430,592,200 | 14,305,922 | Minnesota, United States        | Illumina |
| Fresh water_8      | 4534340.3 | 1,427,643,200 | 14,276,432 | Minnesota, United States        | Illumina |
| Fresh water_9      | 4534346.3 | 1,395,406,900 | 13,954,069 | Minnesota, United States        | Illumina |
| Fresh water_10     | 4534348.3 | 1,031,183,000 | 10,311,830 | Minnesota, United States        | Illumina |
| DW disinfected_1   | 4470937.3 | 86,319,144    | 155,593    | Cincinnati, Ohio, United States | 454      |
| DW disinfected_2   | 4470954.3 | 197,354,490   | 362,640    | Cincinnati, Ohio, United States | 454      |
| DW disinfected_3   | 4509542.3 | 1,191,805,800 | 11,918,058 | Hong Kong SAR, China            | Illumina |
| DW disinfected_4   | 4509336.3 | 3,455,504,600 | 34,555,046 | Hong Kong SAR, China            | Illumina |
| DW disinfected_5   | 4615185.3 | 1,193,976,400 | 11,939,764 | Nanjing, China                  | Illumina |
| DW undisinfected_1 | 4509541.3 | 1,190,701,600 | 11,907,016 | Hong Kong SAR, China            | Illumina |
| DW undisinfected_2 | 4509333.3 | 4,192,434,200 | 41,924,342 | Hong Kong SAR, China            | Illumina |
| DW undisinfected_3 | 4509334.3 | 3,607,833,600 | 36,078,336 | Hong Kong SAR, China            | Illumina |
| DW undisinfected_4 | 4615186.3 | 1,191,712,400 | 11,917,124 | Nanjing, China                  | Illumina |
| DW undisinfected_5 | 4615323.3 | 1,078,393,739 | 10,783,937 | Nanjing, China                  | Illumina |

54 <sup>a</sup> indicates the researchers applied other sequencing method, except for sanger, Illumina and 454 methods.

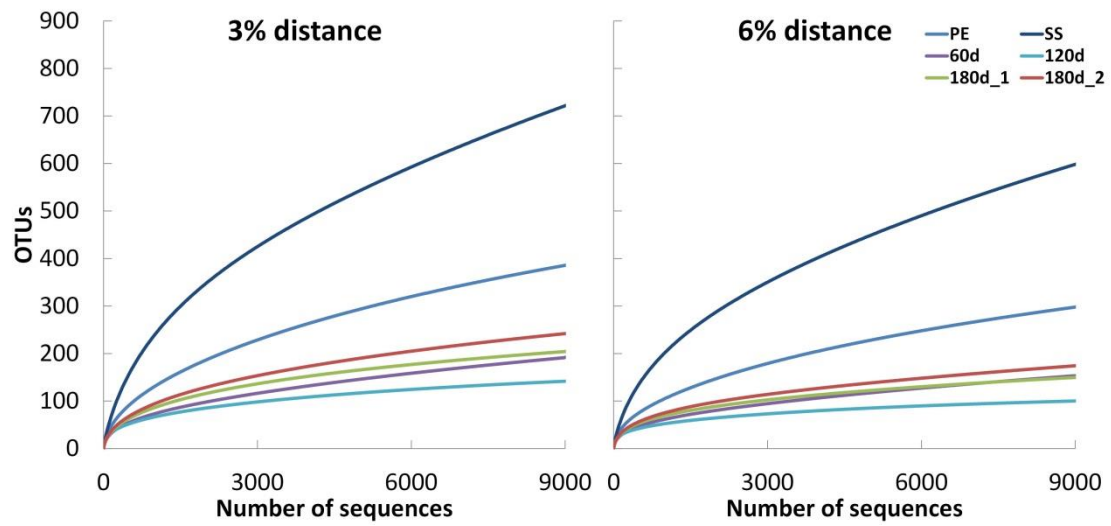

55

56 **Figure S1** Rarefaction curves of OTUs defined by 0.03 and 0.06 cluster distances in  
 57 the DW biofilm samples.

58

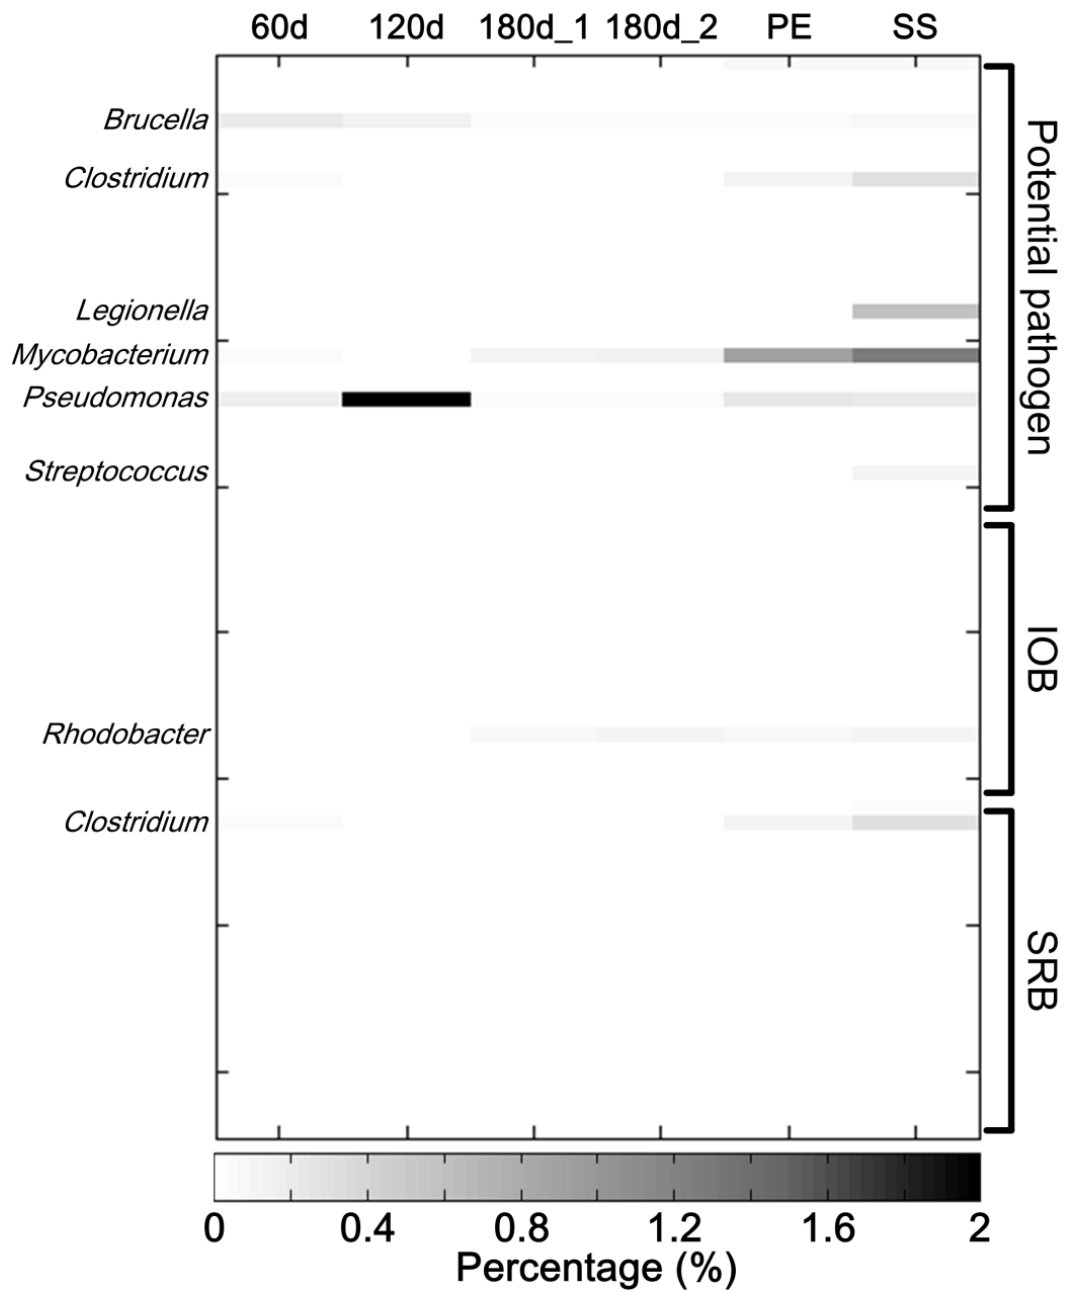

59

60 **Figure S2** Relative distribution of 454 reads in several bacterial groups at the genus  
 61 level, including potentially pathogenic bacteria, iron-oxidizing bacteria, and  
 62 sulfate-reducing bacteria ([Table S1](#)).

63

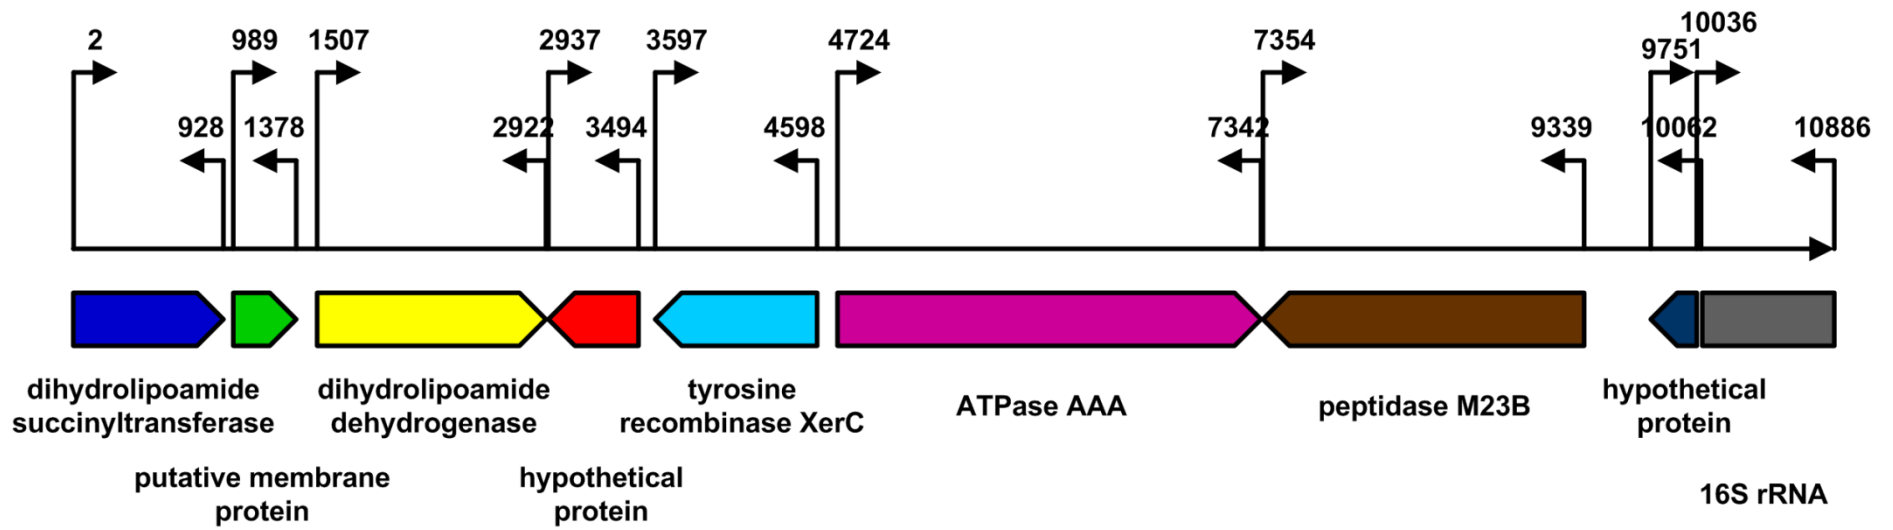

64

65 **Figure S3** The contig which carried 16S rRNA in the draft genome.

66

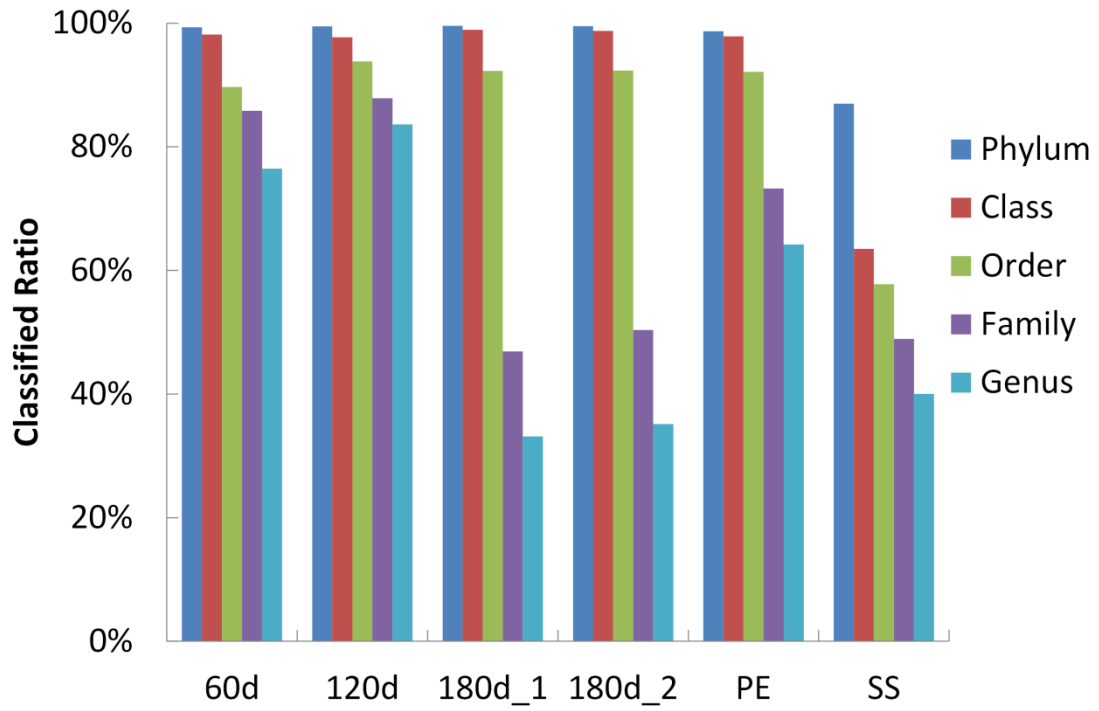

67

68 **Figure S4** Classified ratio of 454 reads at different taxonomic levels, including

69 phylum, class, order, family and genus, in the 6 biofilms by RDP.

70

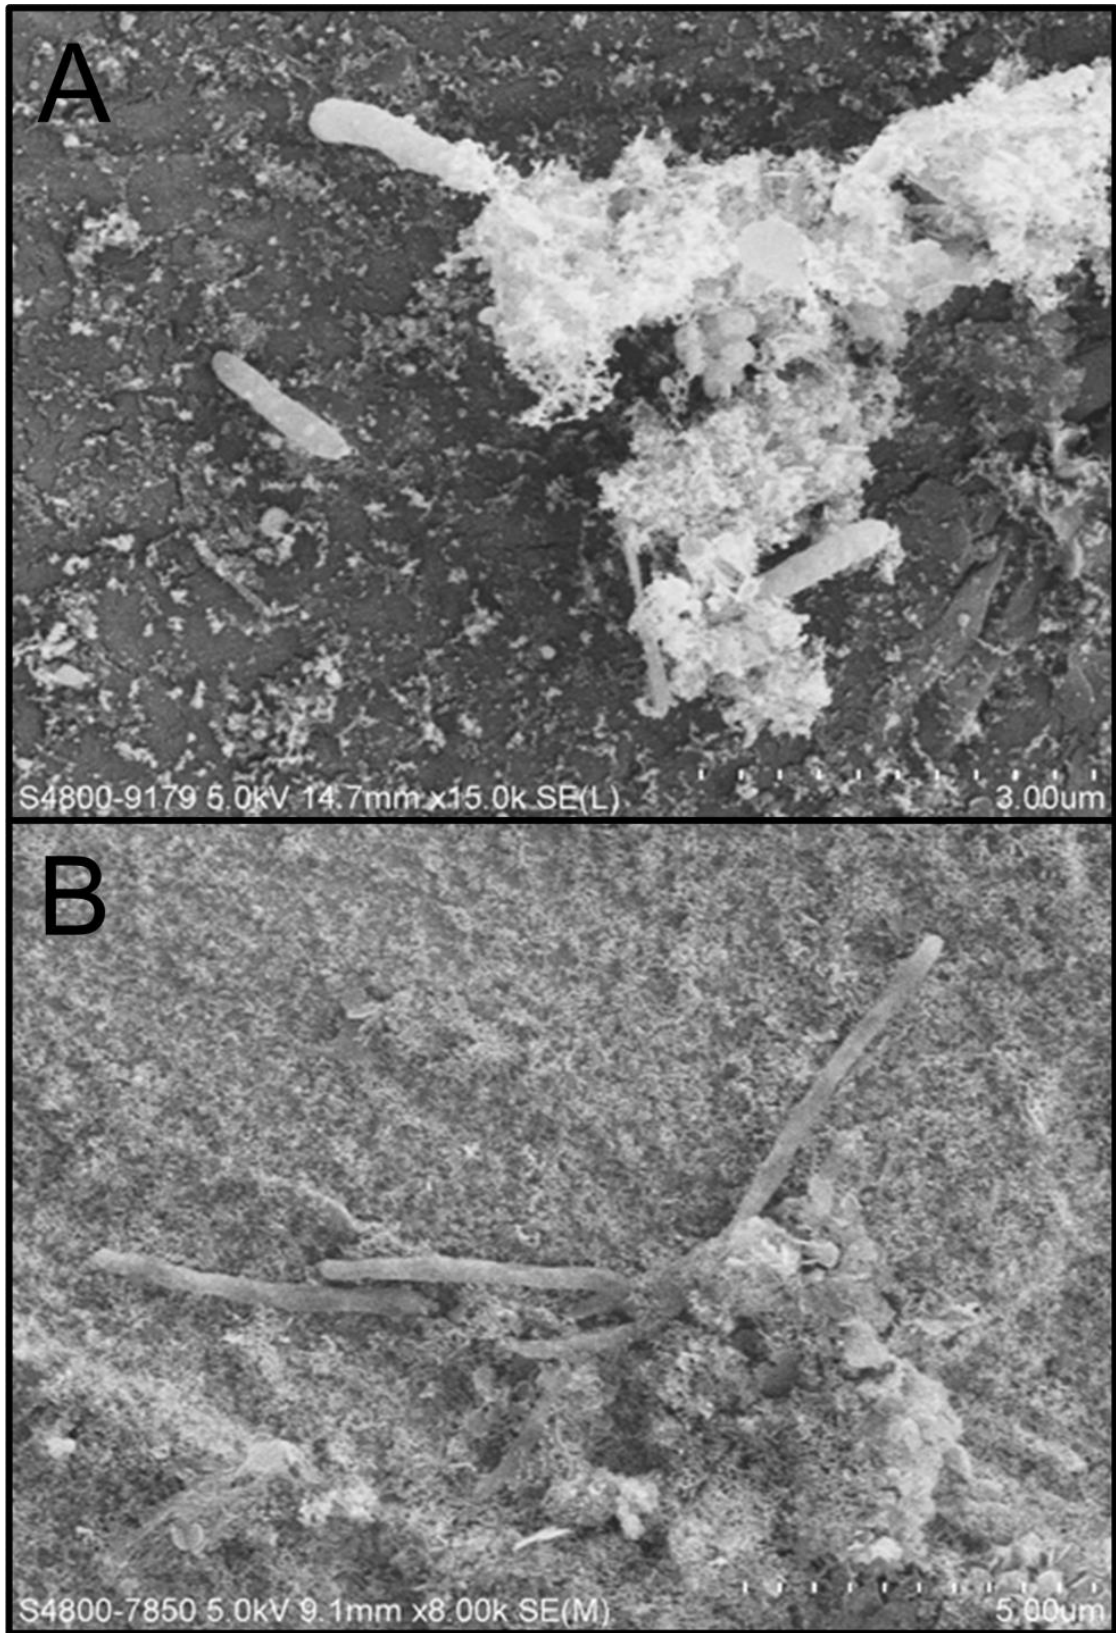

71

72 **Figure S5** SEM images of the DW biofilms formed on PE (A) and SS (B).

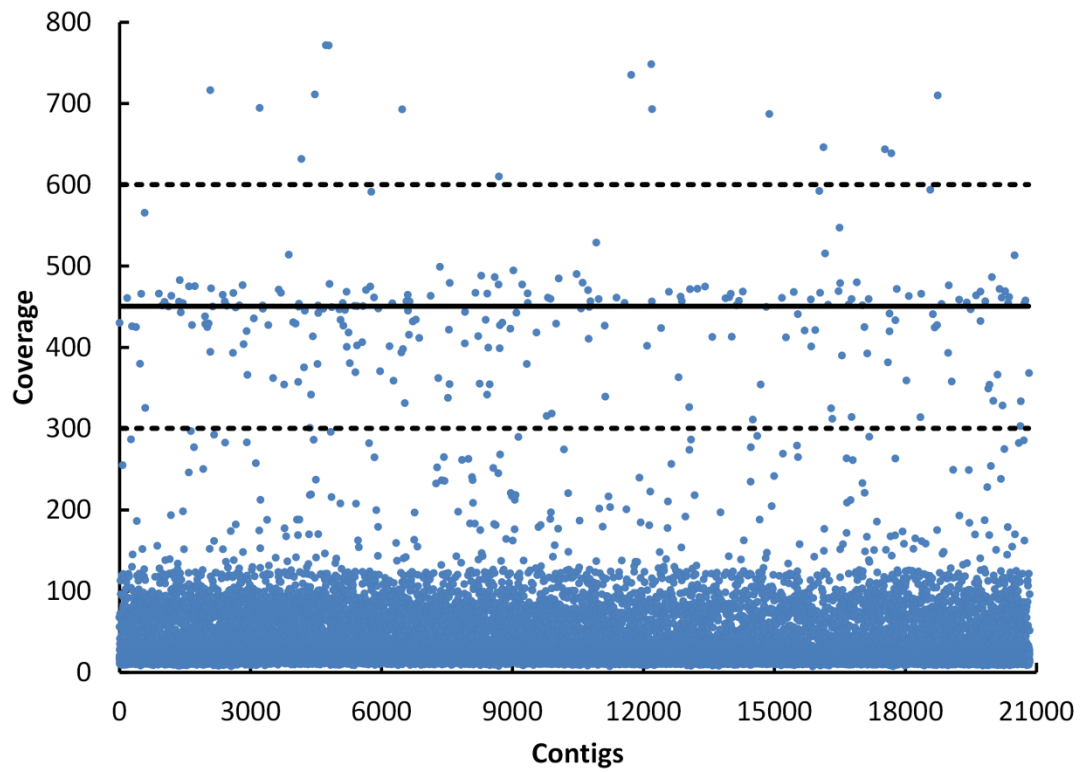

73

74 **Figure S6** Coverage distribution of the assembled contigs in the DW biofilm  
75 metagenome.

76



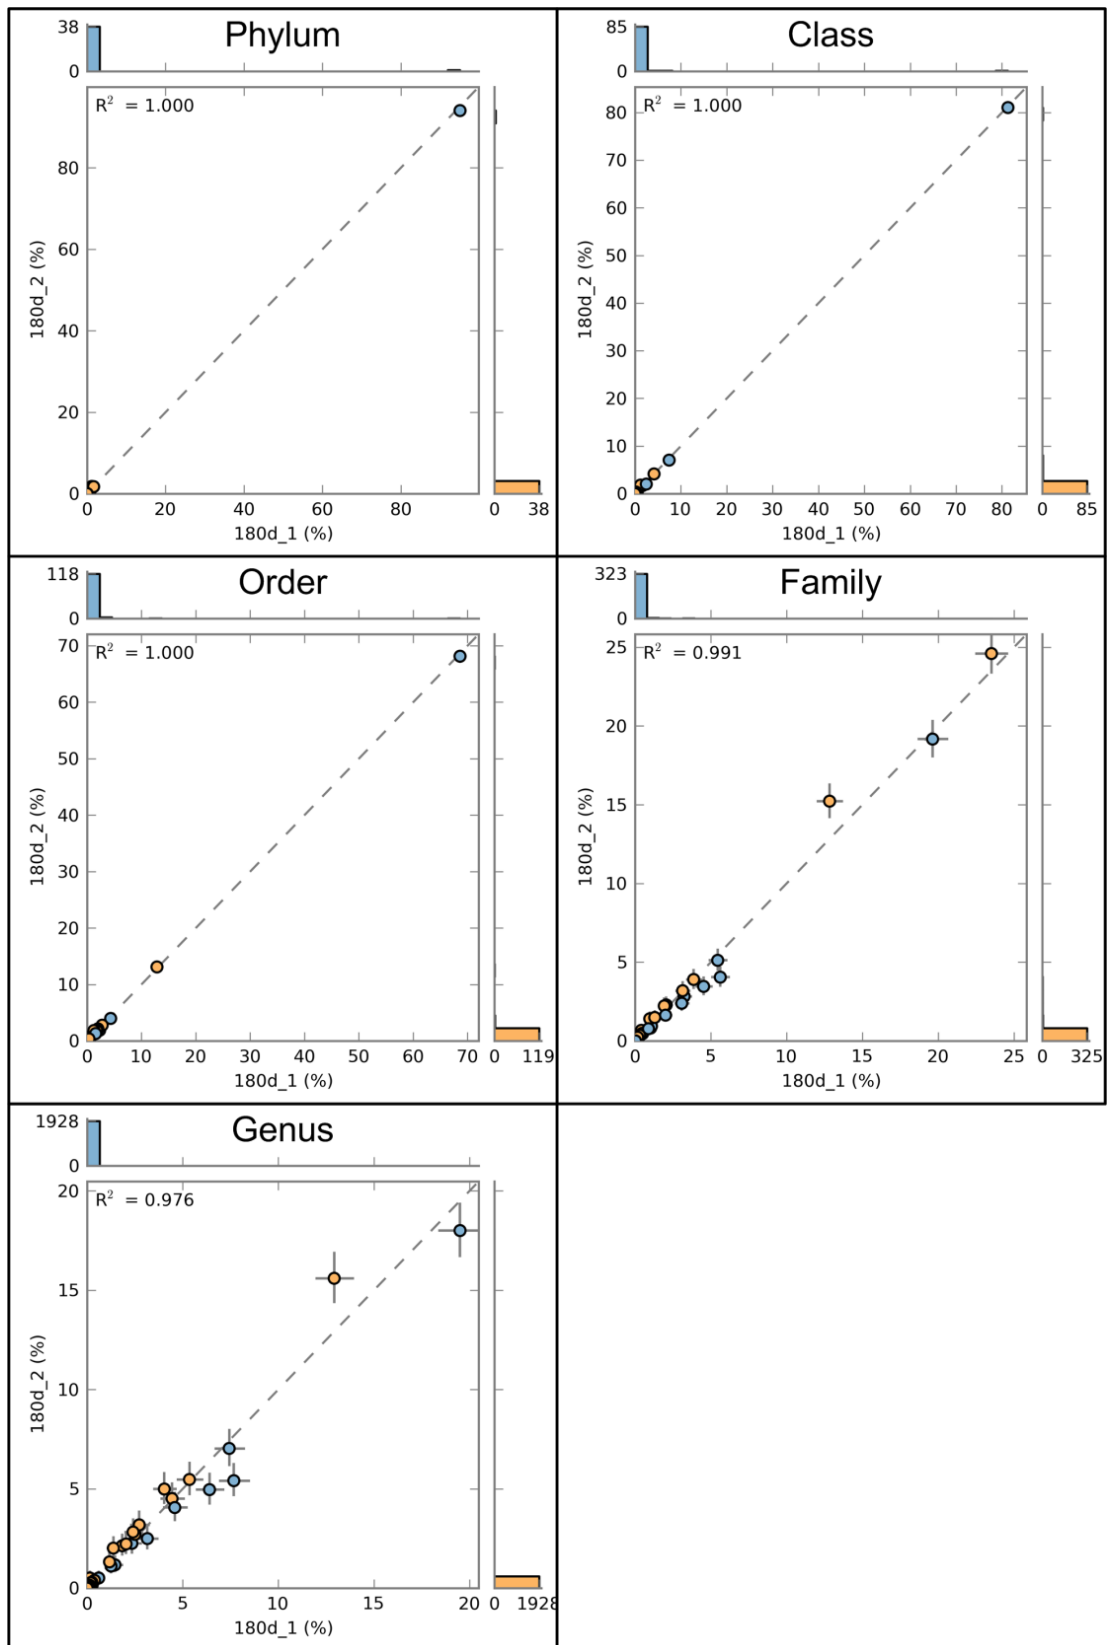

77

78 **Figure S7** Repeatability evaluation of two duplicates, i.e. 180d\_1 (blue) and 180d\_2

79 (brown) biofilms, by Scatter plots using STAMP software.
